# Supplementary material for: Role of reactant concentration and identity of added cation in controlling emission from post-synthetically modified terbium incorporated zinc sulfide nanoparticles: an avenue for the detection of lead(ii) cations
Source: Royal Society of Chemistry journal article supplement (doi:10.1039/c8ra02403k), 2018-01-01
Supplement: c8ra02403k1.pdf [file c8ra02403k1.pdf]

## Supplementary Information

### **Role of reactant concentration and identity of added cation in controlling emission from post-synthetically modified terbium incorporated zinc sulfide nanoparticles: an avenue for the detection of lead(II) cations**

Saoni Rudra,<sup>1</sup> Gouranga H. Debnath<sup>1</sup> and Prasun Mukherjee<sup>1,\*</sup>

<sup>1</sup> Centre for Research in Nanoscience and Nanotechnology, University of Calcutta, JD-2, Sector-III, Salt Lake, Kolkata-700106, West Bengal, India

E-mail: pmukherjee12@gmail.com

\* To whom correspondence should be addressed.

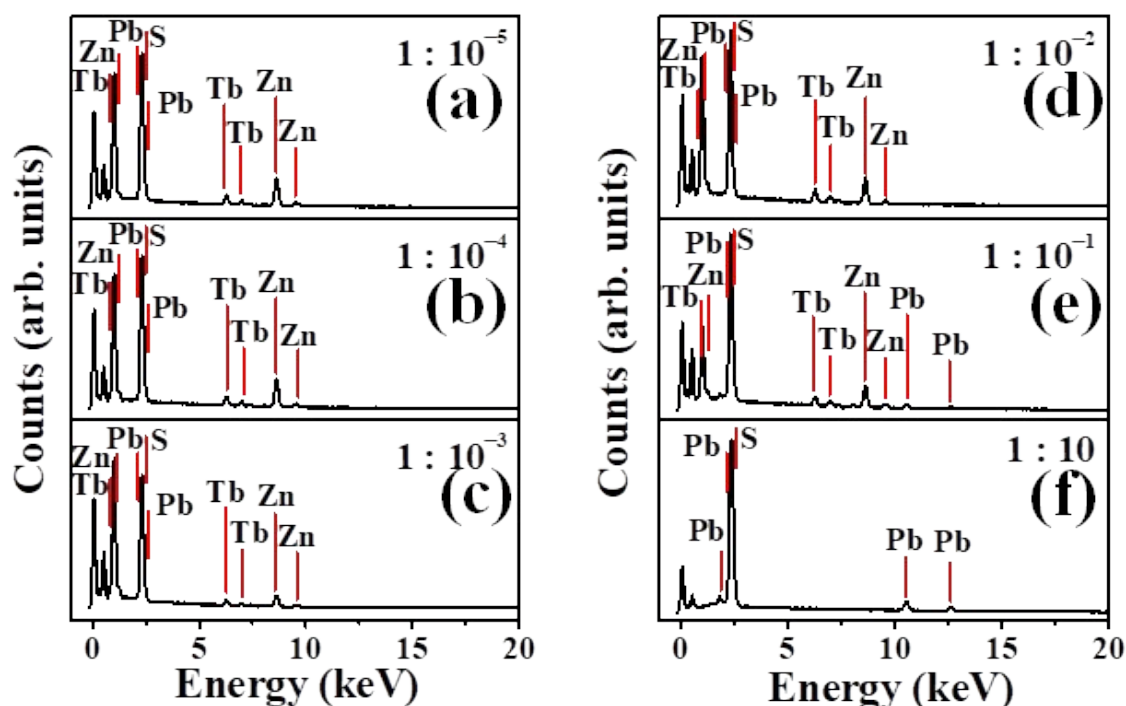

**Figure S1.** The EDS of post-synthetically modified Zn(Tb)S nanoparticles with varying concentrations of Pb<sup>2+</sup> are shown, with the numbers mentioned in each panel representing [Zn(Tb)S] : [Pb<sup>2+</sup>].

**Table S1.** The elemental composition of the nanoparticles studied.<sup>a</sup>

|           | Zn(Tb)S    | [Zn(Tb)S] : [Pb <sup>2+</sup> ] |                    |                    |                    |                    |            |            |
|-----------|------------|---------------------------------|--------------------|--------------------|--------------------|--------------------|------------|------------|
|           |            | 1:10 <sup>-5</sup>              | 1:10 <sup>-4</sup> | 1:10 <sup>-3</sup> | 1:10 <sup>-2</sup> | 1:10 <sup>-1</sup> | 1:1        | 1:10       |
| <b>Zn</b> | 35.9 ± 0.4 | 28.3 ± 5.3                      | 32.3 ± 3.1         | 19.6 ± 3.2         | 32.2 ± 2.1         | 34.1 ± 2.4         | ----       | ----       |
| <b>Tb</b> | 6.3 ± 0.2  | 4.5 ± 0.4                       | 5.4 ± 0.1          | 4.7 ± 0.5          | 6.0 ± 1.0          | 6.8 ± 1.0          | 1.3 ± 0.7  | ----       |
| <b>S</b>  | 57.8 ± 0.4 | 66.6 ± 5.6                      | 61.5 ± 3.1         | 74.4 ± 3.8         | 59.8 ± 2.3         | 48.1 ± 3.6         | 44.8 ± 5.1 | 45.9 ± 1.2 |
| <b>Pb</b> | ----       | 0.5 ± 0.1                       | 0.8 ± 0.5          | 1.3 ± 0.4          | 2.0 ± 0.1          | 11.1 ± 0.8         | 53.8 ± 4.7 | 54.2 ± 1.2 |

<sup>a</sup> The numbers were calculated from the elemental analysis obtained from multiple spatial position of the samples, with the values reported as the average and standard deviation.

**Table S2.** The approximate chemical composition of the nanoparticles studied.<sup>a</sup>

| System                                               | Approximate Chemical Composition                                           |
|------------------------------------------------------|----------------------------------------------------------------------------|
| Zn(Tb)S                                              | Zn <sub>0.36</sub> Tb <sub>0.06</sub> S <sub>0.58</sub>                    |
| [Zn(Tb)S] : [Pb <sup>2+</sup> ] = 1:10 <sup>-5</sup> | Zn <sub>0.28</sub> Tb <sub>0.05</sub> Pb <sub>0.01</sub> S <sub>0.66</sub> |
| [Zn(Tb)S] : [Pb <sup>2+</sup> ] = 1:10 <sup>-4</sup> | Zn <sub>0.32</sub> Tb <sub>0.05</sub> Pb <sub>0.01</sub> S <sub>0.62</sub> |
| [Zn(Tb)S] : [Pb <sup>2+</sup> ] = 1:10 <sup>-3</sup> | Zn <sub>0.20</sub> Tb <sub>0.05</sub> Pb <sub>0.01</sub> S <sub>0.74</sub> |
| [Zn(Tb)S] : [Pb <sup>2+</sup> ] = 1:10 <sup>-2</sup> | Zn <sub>0.32</sub> Tb <sub>0.06</sub> Pb <sub>0.02</sub> S <sub>0.60</sub> |
| [Zn(Tb)S] : [Pb <sup>2+</sup> ] = 1:10 <sup>-1</sup> | Zn <sub>0.34</sub> Tb <sub>0.07</sub> Pb <sub>0.11</sub> S <sub>0.48</sub> |
| [Zn(Tb)S] : [Pb <sup>2+</sup> ] = 1:1                | Pb <sub>0.54</sub> Tb <sub>0.01</sub> S <sub>0.45</sub>                    |
| [Zn(Tb)S] : [Pb <sup>2+</sup> ] = 1:10               | Pb <sub>0.54</sub> S <sub>0.46</sub>                                       |

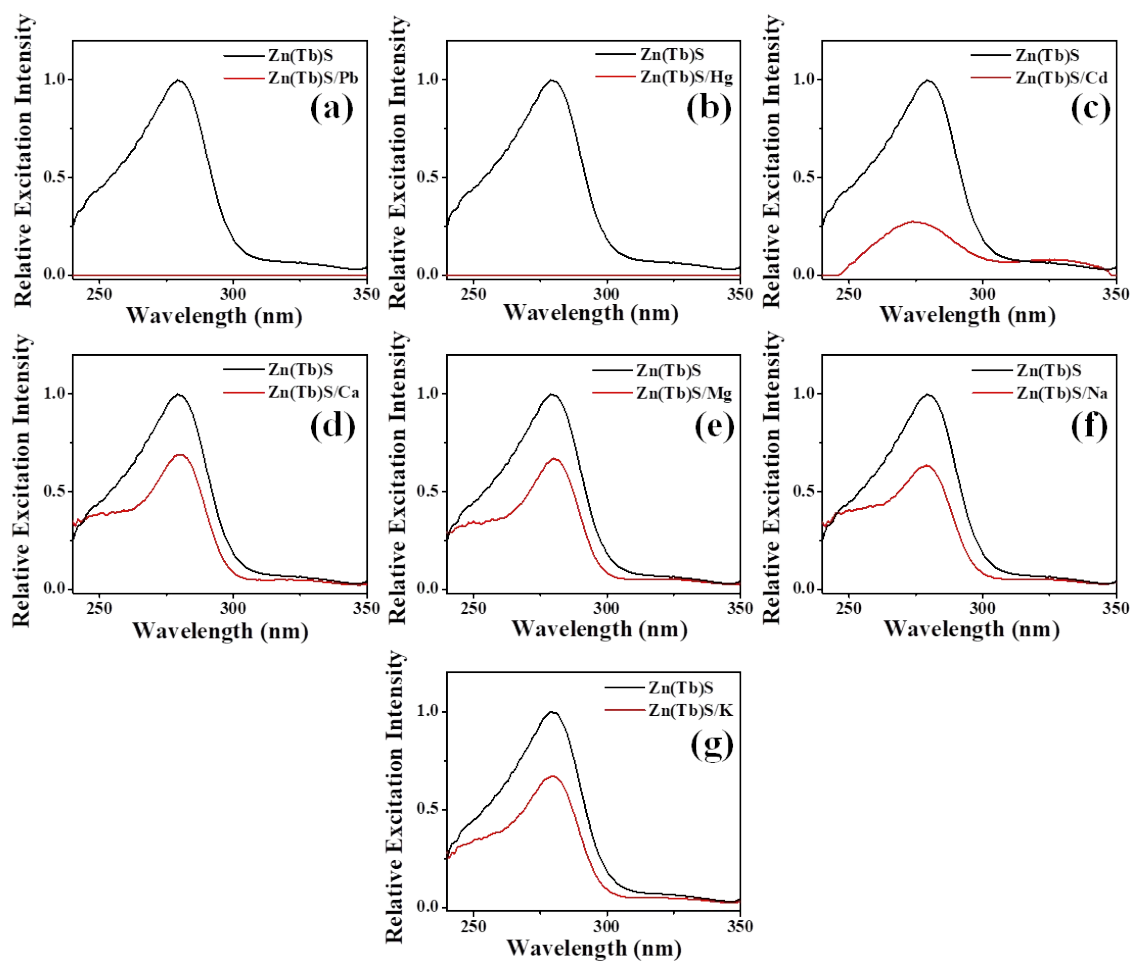

**Figure S2.** The photoluminescence excitation spectra of the Zn(Tb)S nanoparticles those are post-synthetically modified with  $M^{n+}$ , with  $[Zn(Tb)S] : [M^{n+}] = 1:1$ . The emission was collected at 400 nm for collecting the excitation spectra.

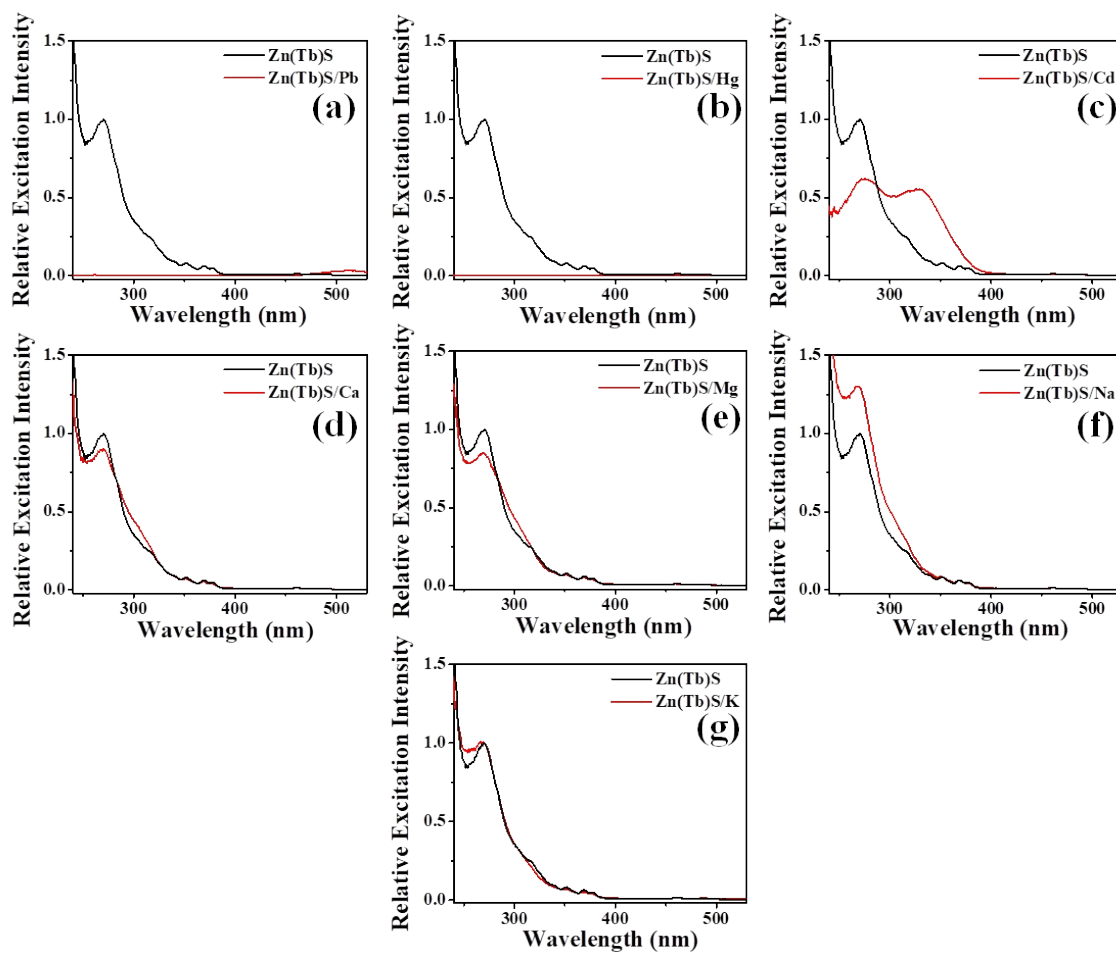

**Figure S3.** The photoluminescence excitation spectra of the Zn(Tb)S nanoparticles those are post-synthetically modified with  $M^{n+}$ , with  $[Zn(Tb)S] : [M^{n+}] = 1:1$ . The emission was collected at 545 nm for collecting the excitation spectra.

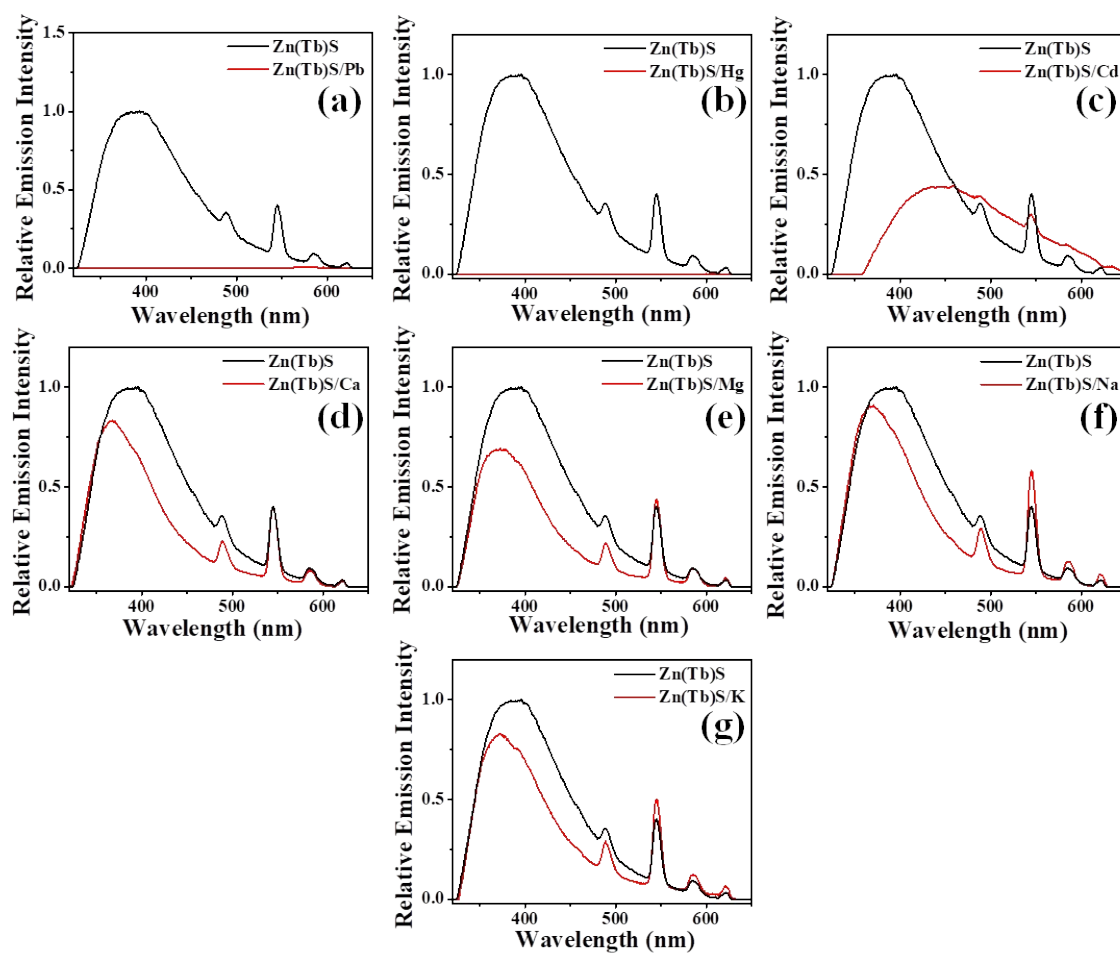

**Figure S4.** The photoluminescence emission spectra of the Zn(Tb)S nanoparticles those are post-synthetically modified with  $M^{n+}$ , with  $[Zn(Tb)S] : [M^{n+}] = 1:1$ . The emission was collected exciting the nanoparticles at 280 nm.

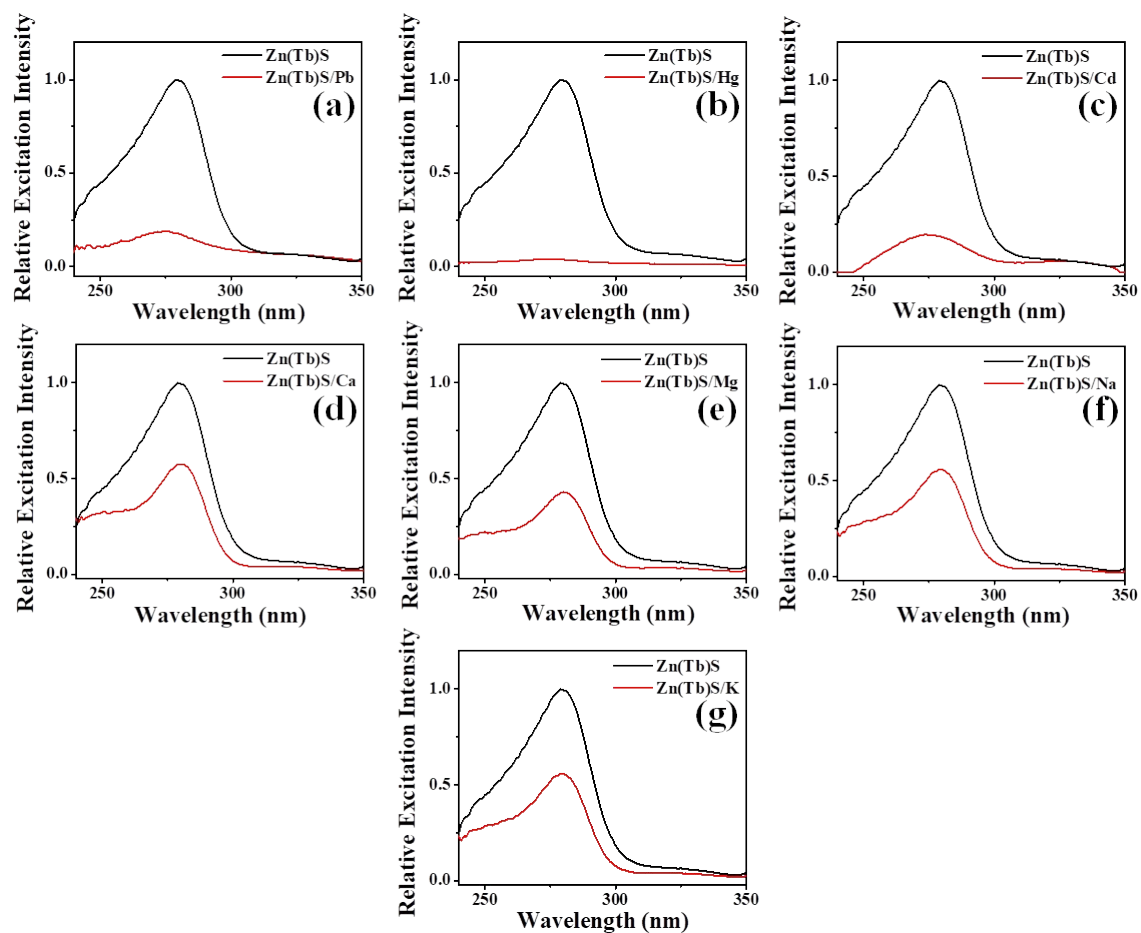

**Figure S5.** The photoluminescence excitation spectra of the Zn(Tb)S nanoparticles those are post-synthetically modified with  $M^{n+}$ , with  $[Zn(Tb)S] : [M^{n+}] = 1:10^{-2}$ . The emission was collected at 400 nm for collecting the excitation spectra.

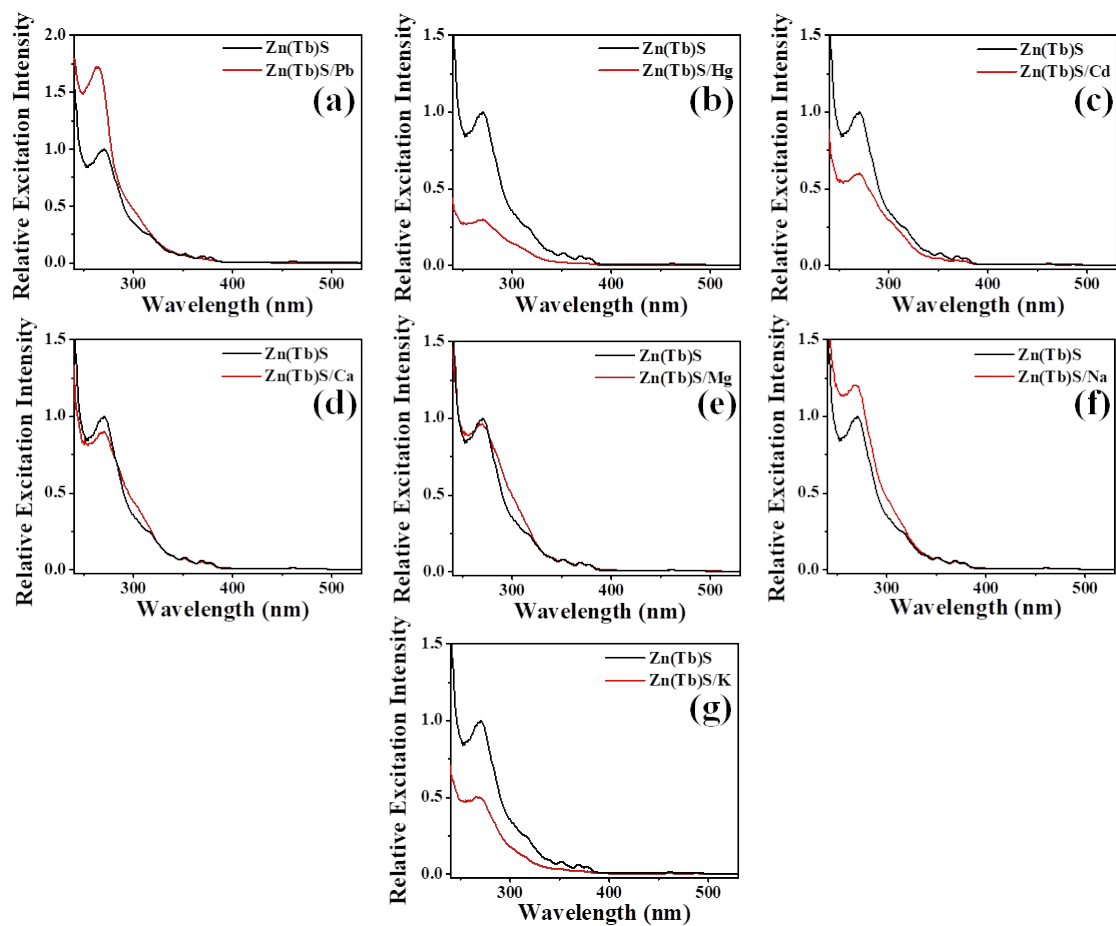

**Figure S6.** The photoluminescence excitation spectra of the Zn(Tb)S nanoparticles those are post-synthetically modified with  $M^{n+}$ , with  $[Zn(Tb)S] : [M^{n+}] = 1:10^{-2}$ . The emission was collected at 545 nm for collecting the excitation spectra.

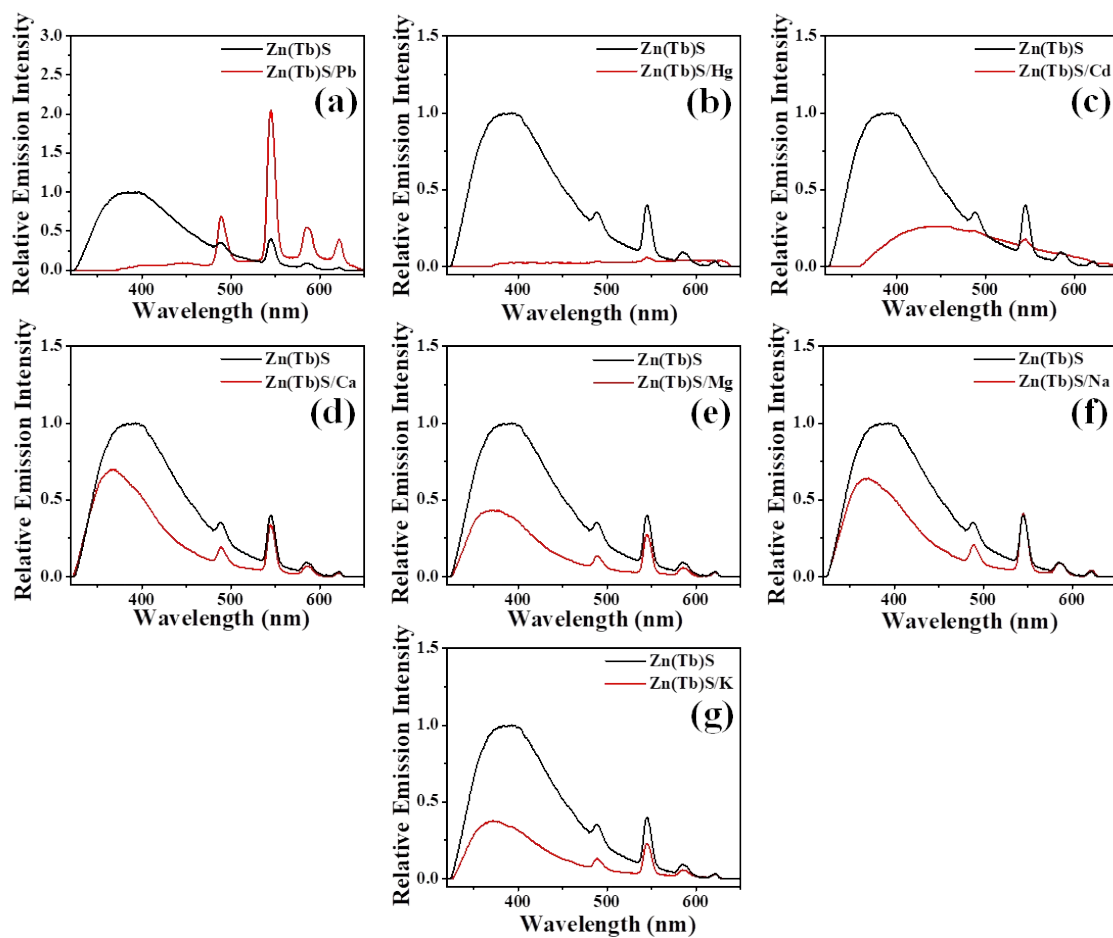

**Figure S7.** The photoluminescence emission spectra of the Zn(Tb)S nanoparticles those are post-synthetically modified with  $M^{n+}$ , with  $[Zn(Tb)S] : [M^{n+}] = 1:10^{-2}$ . The emission was collected exciting the nanoparticles at 280 nm.
